# Supplementary material for: LncRNA MIR31HG is induced by tocilizumab and ameliorates rheumatoid arthritis fibroblast-like synoviocyte-mediated inflammation via miR-214-PTEN-AKT signaling pathway
Source: publisher site journal article supplement (doi:10.18632/aging.203644), 2021-11-09
Supplement: Supplementary file [file aging-v13i21-203644-supplementary-material-SD1.pdf]

**SUPPLEMENTARY FIGURES**

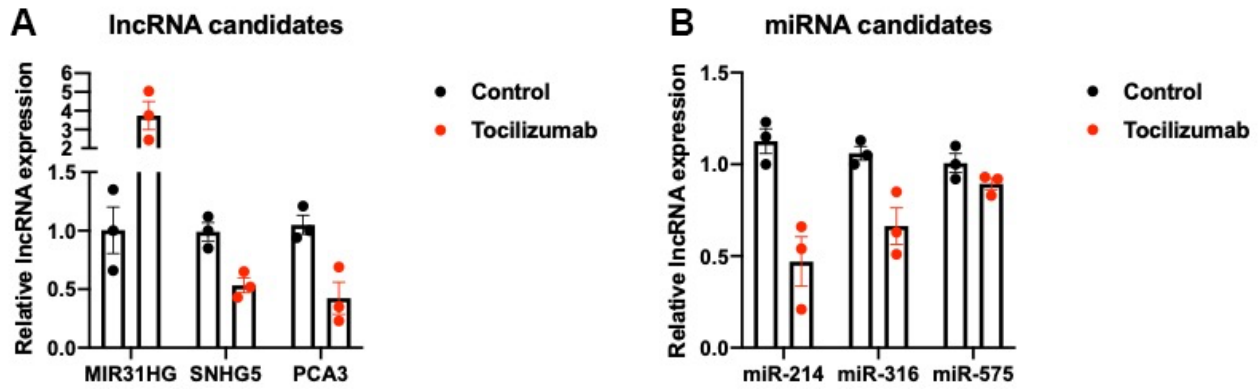

**Supplementary Figure 1.** The candidates of (A) lncRNAs (MIR31HG, SNHG5, PCA3) and (B) miRNAs (miR-214, miR-361, miR-575) were selected for experimental validation.

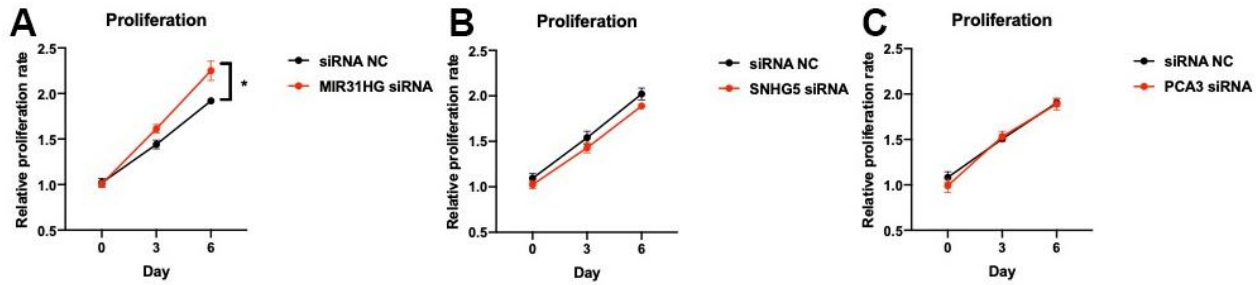

**Supplementary Figure 2.** The effects of knockdown of lncRNAs candidates (A) MIR31HG, (B) SNHG5 and (C) PCA3 on proliferation of RA-FLS. Data represent means ± SEM; \*p < 0.05, as determined by the Student's t test.

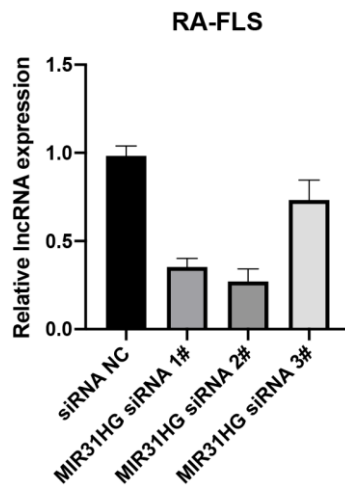

**Supplementary Figure 3.** The knockdown efficiency of MIR31HG siRNAs in RA-FLS.

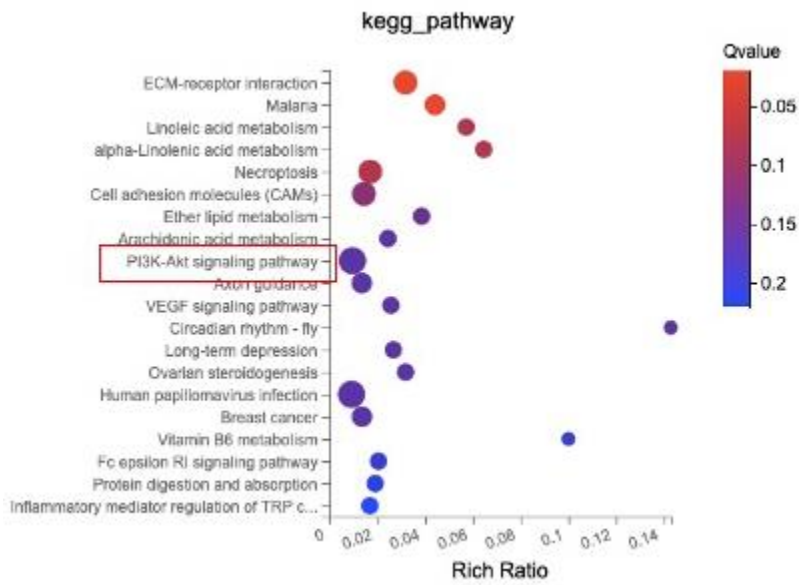

Supplementary Figure 4. The KEGG pathway analysis of miR-214 overexpression RA-FLS.

Correlation analysis of MIR31HG and miR-214 in RA-FLS

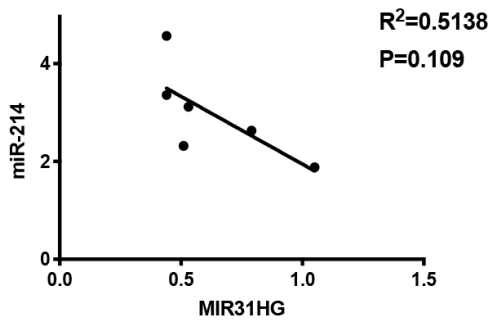

Correlation analysis of PTEN and miR-214 in RA-FLS

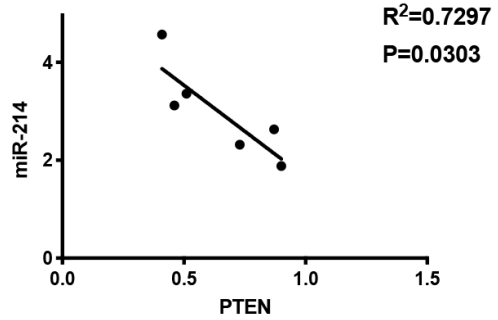

Supplementary Figure 5. The correlation coefficient between MIR31HG and miR-214 or PTEN in RA-FLS.

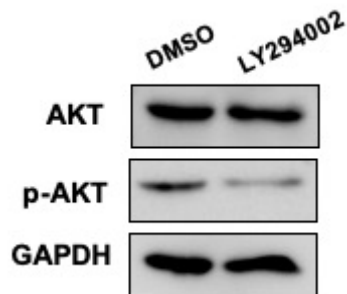

Supplementary Figure 6. The validation of the inhibitory effect of LY294002 on AKT pathway in RA-FLS.

MIR31HG in IL-6 KD RA-FLS

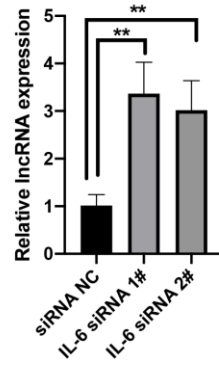

Supplementary Figure 7. The expression of MIR31HG in IL-6 KD RA-FLS.

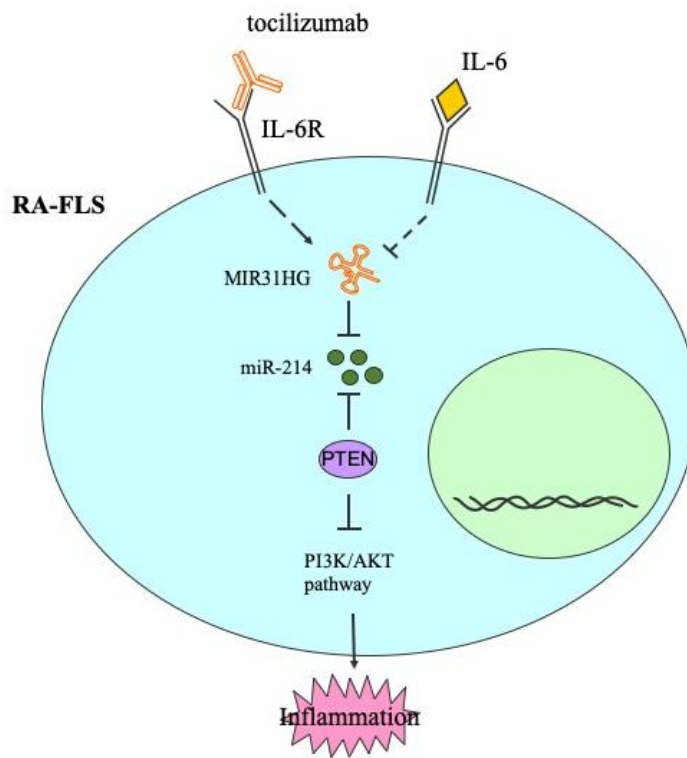

Supplementary Figure 8. The graphic abstract of the current manuscript.

| Gene ID        | Gene Symbol      | Type   | log2 (B3 / B1) | FDR (B3 / B1) | Gene ID          | Gene Symbol | Type       | log2 (B3 / B1) | FDR (B3 / B1) |
|----------------|------------------|--------|----------------|---------------|------------------|-------------|------------|----------------|---------------|
| BGIG9606_55819 | BGIG9606_55819'  | lncRNA | 7.01122726     | 4.54E-08      | hsa-miR-9-5p     | miRNA       | -13.621136 | 7.87E-44       |               |
| 554202         | 'MIR31HG'        | lncRNA | 5.70043972     | 3.91E-04      | hsa-miR-138-2-3p | miRNA       | -12.036174 | 1.42E-14       |               |
| 100533184      | 'ARHGAP19-SLIT1' | lncRNA | 5.52356196     | 1.96E-05      | hsa-miR-316-5p   | miRNA       | -12.036174 | 1.43E-14       |               |
| BGIG9606_46824 | BGIG9606_46824'  | lncRNA | 4.95419631     | 6.51E-05      | hsa-miR-135a-5p  | miRNA       | -11.929258 | 6.78E-14       |               |
| BGIG9606_58794 | BGIG9606_58794'  | lncRNA | 4.42626475     | 1.05E-04      | hsa-miR-575-5p   | miRNA       | -11.550747 | 1.65E-10       |               |
| BGIG9606_51809 | BGIG9606_51809'  | lncRNA | 4.169925       | 3.37E-08      | hsa-miR-664b-3p  | miRNA       | -11.287712 | 8.12E-09       |               |
| BGIG9606_44551 | BGIG9606_44551'  | lncRNA | 4.02974734     | 9.59E-04      | hsa-miR-214-5p   | miRNA       | -11.228819 | 1.76E-08       |               |
| 105378345      | 'LOC105378345'   | lncRNA | 4              | 3.22E-04      | hsa-miR-1225-5p  | miRNA       | -11.167418 | 3.82E-08       |               |
| BGIG9606_59237 | BGIG9606_59237'  | lncRNA | 3.84130225     | 4.48E-06      | hsa-miR-106b-5p  | miRNA       | -11.103288 | 1.77E-08       |               |
| 105376244      | 'LOC105376244'   | lncRNA | 3.80735492     | 9.28E-04      | hsa-miR-2278     | miRNA       | -11.036174 | 1.76E-07       |               |
| 107987330      | 'FAM239C'        | lncRNA | 3.70043972     | 9.59E-04      | hsa-miR-6770-5p  | miRNA       | -10.965784 | 3.73E-07       |               |
| BGIG9606_50097 | BGIG9606_50097'  | lncRNA | 3.5849625      | 8.36E-08      | hsa-miR-365a-5p  | miRNA       | -10.891784 | 8.17E-07       |               |
| 399717         | 'GATA3-AS1'      | lncRNA | 3.32192809     | 1.84E-04      | hsa-miR-4750-5p  | miRNA       | -10.813781 | 1.78E-06       |               |
| 100534612      | 'C1QTNF3-AMACR'  | lncRNA | 3.169925       | 2.58E-06      | hsa-miR-4647     | miRNA       | -10.813781 | 1.77E-06       |               |
| BGIG9606_45073 | BGIG9606_45073'  | lncRNA | 3.02974734     | 6.32E-05      | hsa-miR-142-5p   | miRNA       | -10.550747 | 1.78E-05       |               |
| BGIG9606_47247 | BGIG9606_47247'  | lncRNA | 3              | 2.12E-09      | hsa-miR-4440     | miRNA       | -10.550747 | 1.77E-05       |               |
| 105376373      | 'LOC105376373'   | lncRNA | 2.63742992     | 2.36E-04      | hsa-miR-219a-5p  | miRNA       | -10.550747 | 1.76E-05       |               |
| BGIG9606_40631 | BGIG9606_40631'  | lncRNA | 2.5849625      | 7.08E-04      | hsa-miR-302d-3p  | miRNA       | -10.451211 | 3.78E-05       |               |
| BGIG9606_50404 | BGIG9606_50404'  | lncRNA | 2.50250034     | 6.09E-04      | hsa-miR-216a-5p  | miRNA       | -10.451211 | 3.80E-05       |               |

**Supplementary Figure 9. Top 20 up-regulated lncRNAs and down-regulated miRNAs in tocilizumab-treated RA-FLS.**
